# Supplementary material for: Nuclear ARRB1 induces pseudohypoxia and cellular metabolism reprogramming in prostate cancer
Source: PubMed Central journal article supplement (PMC4194125; doi:10.15252/embj.201386874), 2014-05-16
Supplement: embj0033-1365-sd2.pdf [file embj0033-1365-sd2.pdf]

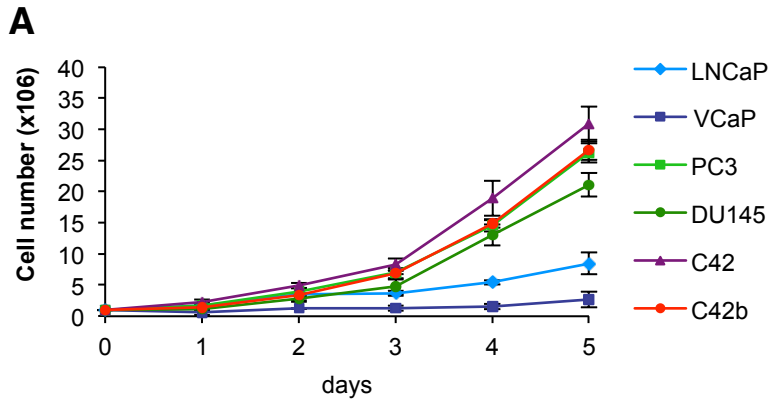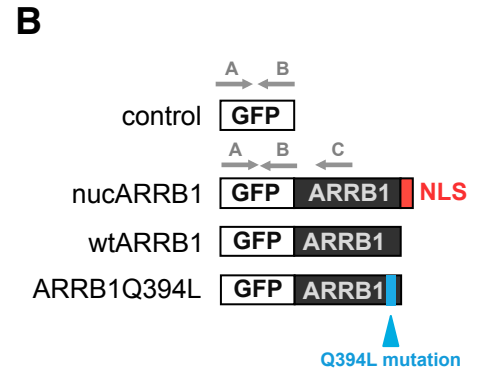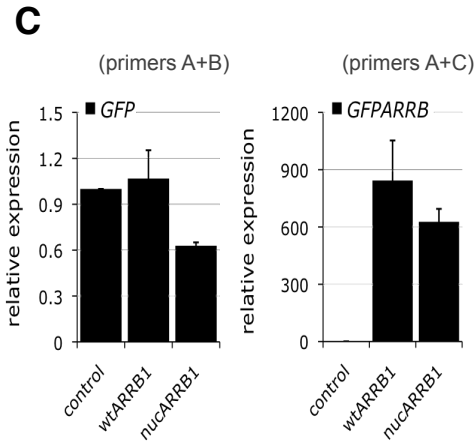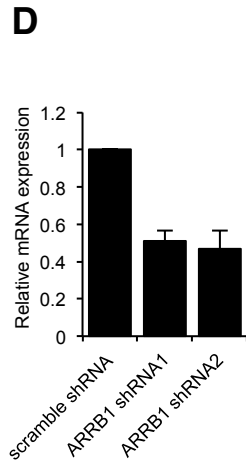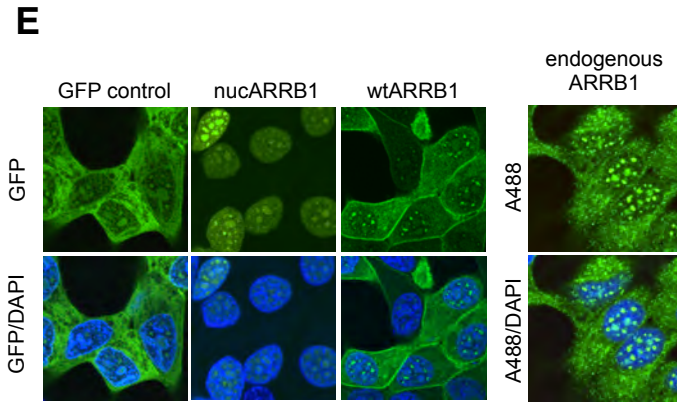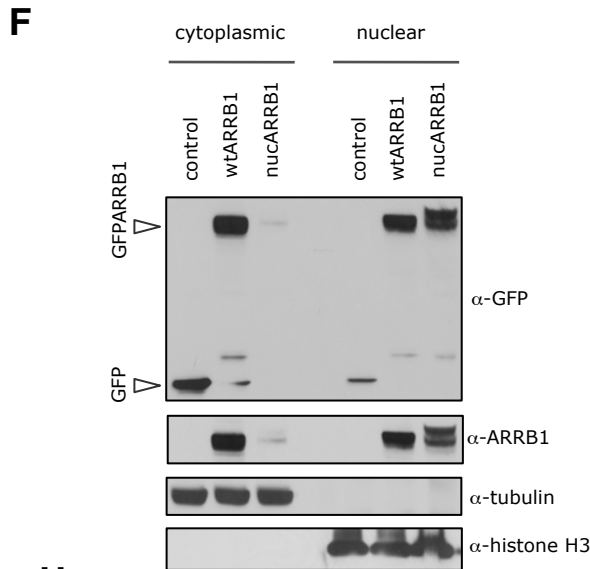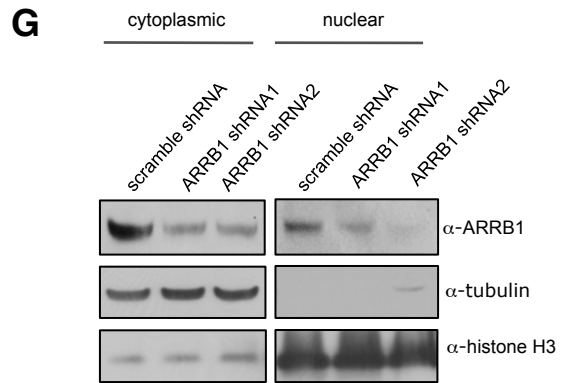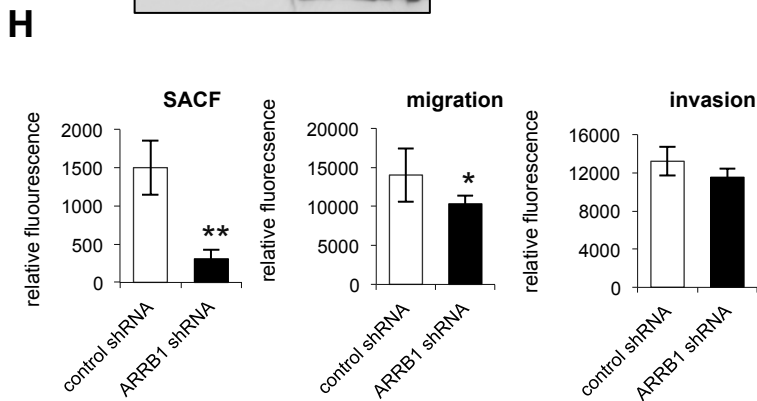

**Supplemental Figure S2. Characterization of ARRB1 overexpressing and ARRB1 knock-down (KD) cell-lines used in this study.**

**A.** Comparison of the growth rates of a panel of prostate cancer cell lines expressing different levels of ARRB1 (see Figure 2A).

**B.** GFP control, nucARRB1, wtARRB1 and Q394LARRB1 constructs used in the generation of stable cell-lines in this study. The primers (A, B and C) locations used for measuring the expression levels of the various constructs are highlight on the constructs schematics. NLS=nuclear localization signal. Q394LARRB1 mutant construct was previously characterized<sup>32,33</sup>.

**C-D.** Expression levels of exogenous ARRB1 constructs (wtARRB1 and nucARRB1) vs control (GFP) and endogenous (scramble control) vs ARRB1 knockdown (shRNA1 and 2) as determined by qRT-PCR using the primer pairs highlighted in B.

**E.** Confocal sections showing GFP fluorescence in GFP control and GFP-tagged ARRB1 expressing cells (left) and endogenous ARRB1 in parental C4-2s (right, primary=A1CT anti-ARRB, secondary=A488-conjuguated anti-rabbit). WtARRB1 localises to the membrane, cytoplasm and nucleus, whereas nucARRB1 is solely nuclear with a pattern very similar to that of the nuclear fraction of the endogenous protein. A488 and GFP=green, DAPI=blue.

**F.** Immunoblot of the cytoplasmic/nuclear fractions in endogenous and stable ARRB1-overexpressing cell-lines. Tubulin and Histone H3 were used as markers for cytoplasmic and nuclear fractions, respectively.

**G.** Immunoblot of cytoplasmic/nuclear fractions in control and two different ARRB1 shRNA cell-lines. Tubulin and Histone H3 were used as markers for cytoplasmic and nuclear fractions, respectively.

**H.** SACF (Soft Agar Colony Formation, i.e. anchorage-independent growth), migration and invasion of nucARRB1 vs control of scramble shRNA vs ARRB1 shRNA. n=6, values are mean  $\pm$  s.e.m., \*p-value<0.05, \*\*p-value<0.01.
