# Supplementary material for: Nuclear ARRB1 induces pseudohypoxia and cellular metabolism reprogramming in prostate cancer
Source: PubMed Central journal article supplement (PMC4194125; doi:10.15252/embj.201386874), 2014-05-16
Supplement: embj0033-1365-sd3.pdf [file embj0033-1365-sd3.pdf]

**A**

number of binding sites

| ChIP     | <u>endoARRB1</u> | <u>nucARRB1</u> | <u>tissue</u> |
|----------|------------------|-----------------|---------------|
| ARRB1    | 11129            | 14916           | 7530          |
| p300     | 41727            | 52180           | -             |
| H3K4me1  | 129397           | 117859          | 71104         |
| H3K4me3  | 27347            | 25552           | 24180         |
| RNAPoIII | 68667            | 43603           | -             |

**B**

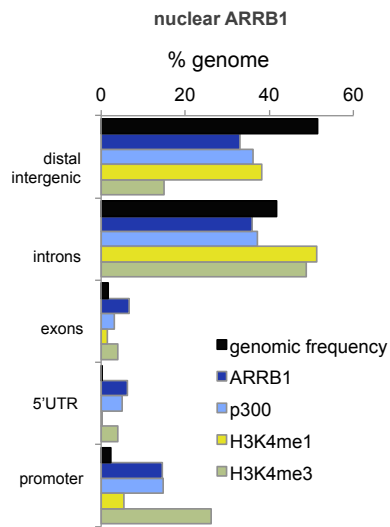

**C**

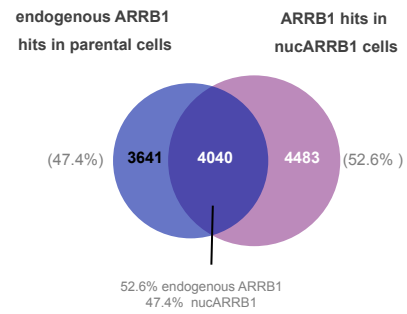

**D**

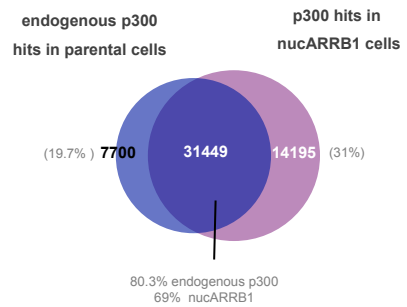

**E**

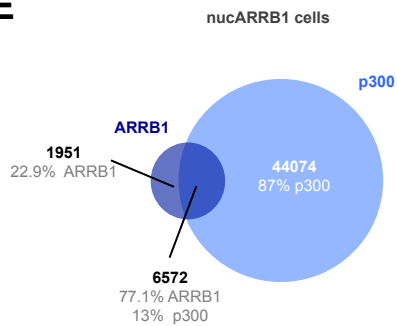

**F**

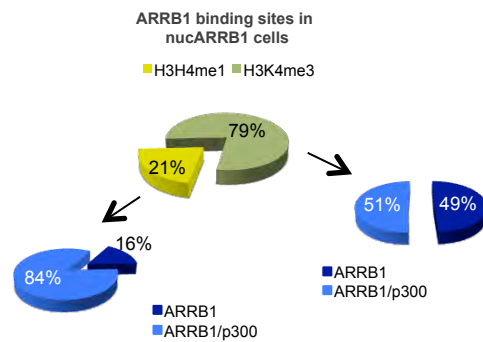

**Supplemental Figure S3. Genomic landscape of cells stably overexpressing nuclear ARRB1.**

**A.** Number of MACS peaks for ARRB, p300, H3K4me1, H3K4me3 and RNAPII ChIPs in parental C4-2, stable nucARRB1 C4-2s and human prostate tissue.

**B.** Genomic distribution generated using CEAS of ARRB1, p300, H3K4me1 and H3K4me3 in nucARRB1 C4-2 cells compared to the genomic frequency of the regions considered.

**C.** Venn diagram showing the overlap (minimum 1bp) between ARRB peaks in parental C4-2 (endogenous ARRB1) and nucARRB1 cells.

**D.** Venn diagram showing the overlap (minimum 1bp) between p300 peaks in parental C4-2 (endogenous ARRB1) and nucARRB1 cells.

**E.** Venn diagram showing the overlap (minimum 1bp) between functional endogenous ARRB1 and p300 binding sites in nucARRB1 cells.

**F.** Distribution of ARRB1 binding sites, either alone or shared with p300, relative to enhancer (H3K4me1) and promoter (H3K4me3) regions in nucARRB1 cells.
