# Supplementary material for: Nuclear ARRB1 induces pseudohypoxia and cellular metabolism reprogramming in prostate cancer
Source: PubMed Central journal article supplement (PMC4194125; doi:10.15252/embj.201386874), 2014-05-16
Supplement: embj0033-1365-sd4.pdf [file embj0033-1365-sd4.pdf]

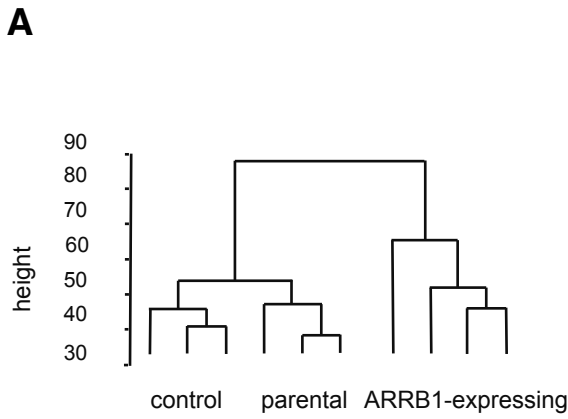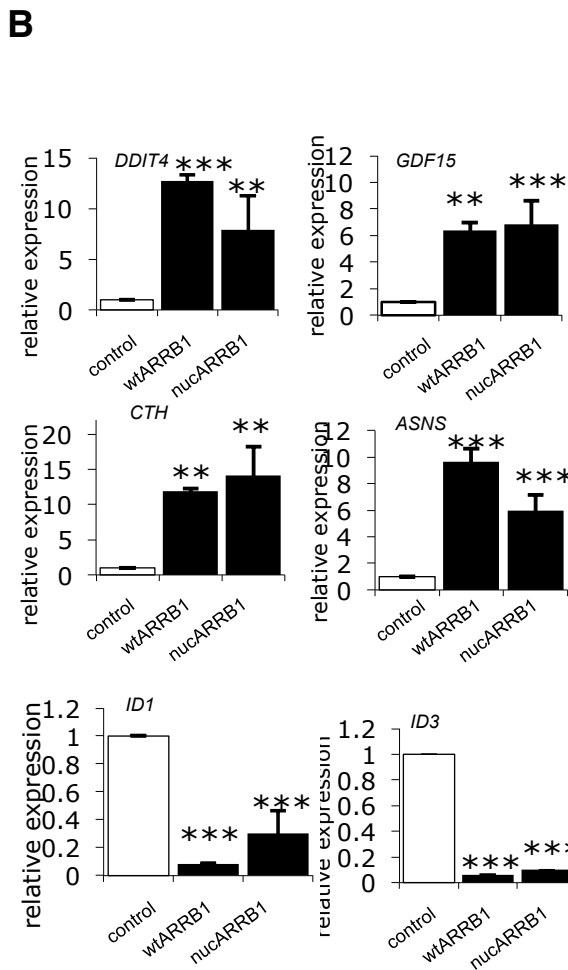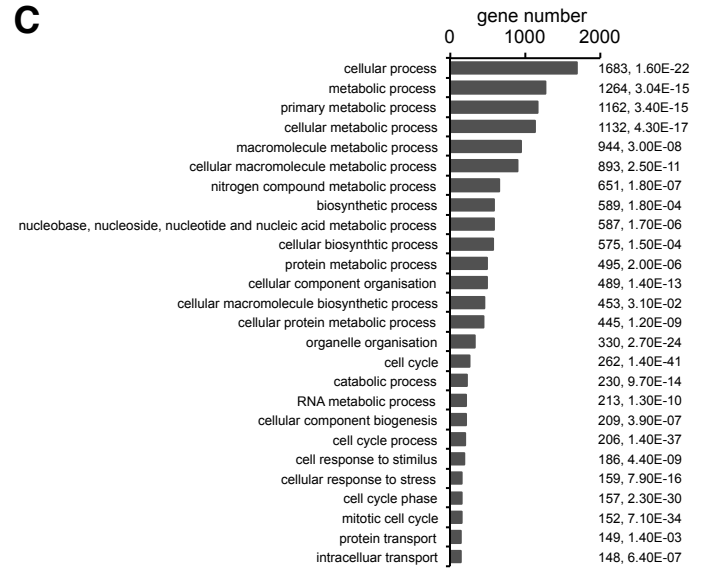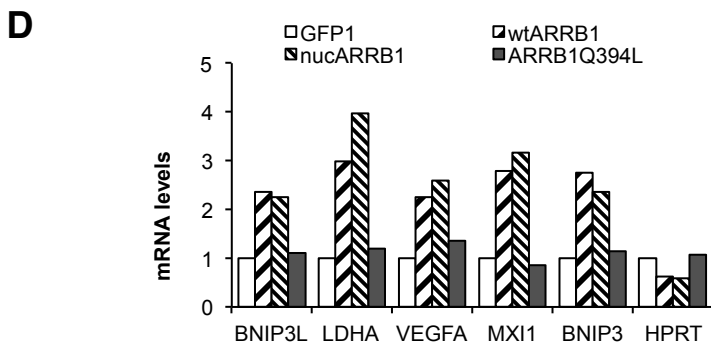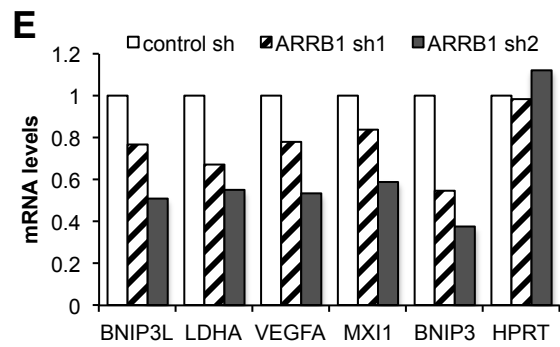

### Direct transcriptional targets of ARRB1.

In order to narrow down our search for direct transcriptional targets of ARRB1, we integrated the ChIP data and gene expression profiling obtained in nucARRB1 cells. Rather than setting an arbitrary threshold, we used GSEA (Subramanian et al., 2005) to identify the genomic distance for which the correlation between altered gene expression (ranked by increasing p-value using  $-\log_2[p\text{-value}]$ ) and the binding of ARRB1 is optimal. We used sliding windows of increasing size around the ARRB1 binding sites limiting ourselves to a maximum of 20kb since. Whilst more distal sites could regulate gene expression, the technical challenges of employing unbiased chromosome conformation capture to identify these sites lie beyond the scope of this study. We found that the 10kb window generated the most significant enrichment in ARRB1-regulated genes. Using this window, we derived a core set of 854 potential direct transcriptional target genes of ARRB1 (Table 1B).

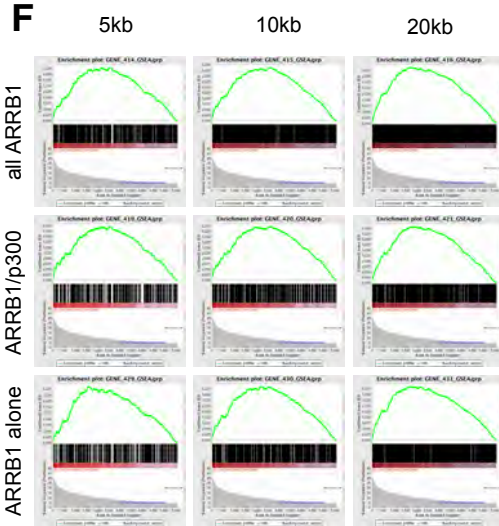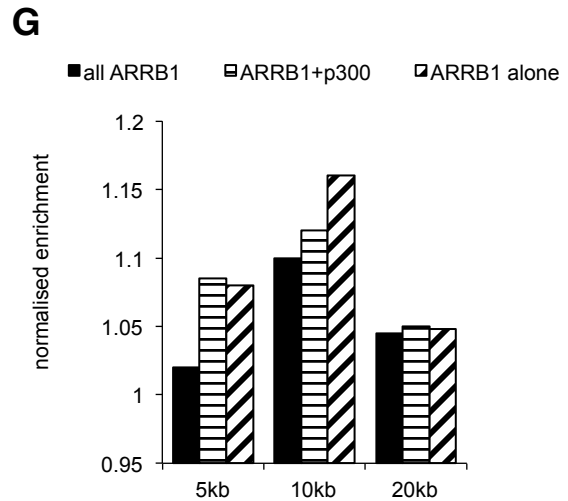

H

| Category                   | Count | %           | p-value  | FDR      |
|----------------------------|-------|-------------|----------|----------|
| Translation                | 44    | 5.378973105 | 4.68E-10 | 8.22E-07 |
| cellular process           | 543   | 66.38141809 | 7.21E-10 | 1.28E-06 |
| cellular metabolic process | 374   | 45.72127139 | 5.33E-09 | 9.47E-06 |
| cell cycle                 | 72    | 8.80195599  | 1.12E-08 | 1.99E-05 |
| translational elongation   | 21    | 2.567237164 | 2.24E-08 | 3.98E-05 |
| DNA replication            | 29    | 3.54232274  | 3.61E-05 | 6.41E-05 |
| metabolic process          | 414   | 50.61124694 | 6.06E-08 | 1.08E-04 |
| cell cycle process         | 56    | 6.84596577  | 7.30E-08 | 1.30E-04 |

I

#### Top Canonical Pathways

| Name                                                           | p-value  | Ratio          |
|----------------------------------------------------------------|----------|----------------|
| <a href="#">EiF2 Signaling</a>                                 | 1.3E-06  | 22/202 (0.109) |
| <a href="#">Hypoxia Signaling in the Cardiovascular System</a> | 1.72E-04 | 10/66 (0.152)  |
| <a href="#">mTOR Signaling</a>                                 | 2.41E-04 | 18/211 (0.085) |
| <a href="#">Prostate Cancer Signaling</a>                      | 3.8E-04  | 11/98 (0.112)  |
| <a href="#">Mitotic Roles of Polo-Like Kinase</a>              | 8.02E-04 | 9/69 (0.13)    |

J

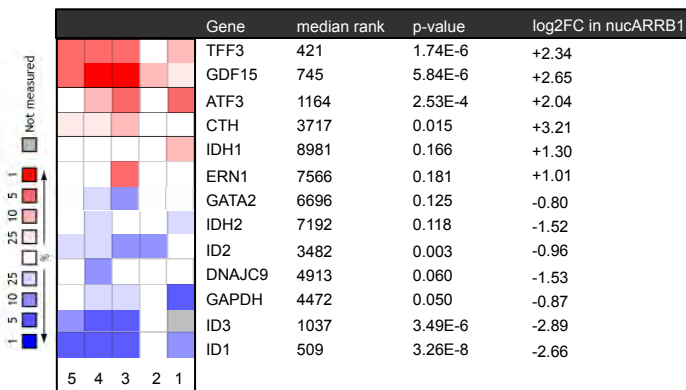

1. Yu, J Clin Oncol (2004)
2. Wallace, Cancer Res (2008)
3. Varambally, Cancer Cell (2005)
4. Taylor, Cancer Cell (2010)
5. Grasso, Nature (2012)

**Supplemental Figure S4. Transcriptional landscape of ARRB1 in prostate cancer cells.**

**A.** Gene probes from gene expression profiling in parental C4-2, GFP control, wtARRB1 and nucARRB1 cell-lines were grouped into clusters of similar expression profiles. Both parental C4-2 and GFP control cells grouped in close adjacent clusters whereas wtARRB1 and nucARRB1 (collectively named ARRB1-expressing) were mixed in a separate branch.

**B.** Validation of the gene expression array experiment. Sixty-two differentially regulated transcripts were chosen and qRT-PCR was performed on total mRNA samples extracted from GFP-, wtARRB1- or nucARRB1-expressing C4-2 cells. Out of these, 61 confirmed the expression levels reported in the gene expression array. The results of 12 different transcripts are shown here.

**C.** Functional analysis of the nucARRB1 transcriptome using DAVID Gene Ontology analysis showing an enrichment of genes involved in cellular metabolism and cell cycle. Gene number and p-value are shown on the right of the graph.

**D-E.** Expression levels of targets genes common to ARRB1 and HIF1A by qPCR in GFP control vs wtARRB1, nucARRB1 and ARRB1Q394L or ARRB1 KD vs control. For all graphs, values are means  $\pm$  s.e.m. of 3 replicates. \* $p$ -value<0.05, \*\* $p$ -value<0.01, \*\*\* $p$ -value<0.001.

**F.** GSEA plots of normalized enrichment of the genes with altered expression in nucARRB1 that have an ARRB1 binding site within 5, 10 or 20kb of their TSS.

**G.** Histogram of the normalized enrichment maxima from the plots above plotted for each condition.

**H.** DAVID gene ontology analysis of the direct transcriptional targets of ARRB1.

**I.** IPA analysis of the ARRB1 direct transcriptional targets showing the associated top canonical pathways.

**J.** Summary of gene expression data from five separate studies using clinical samples showing the expression of multiple direct ARRB1 targets in prostate cancer compared with benign (represented as the percentile rank for each gene in each set and labeled with median gene rank and median  $P$ -value for each gene over all nine studies; data from Oncomine).
