# Supplementary material for: Nuclear ARRB1 induces pseudohypoxia and cellular metabolism reprogramming in prostate cancer
Source: PubMed Central journal article supplement (PMC4194125; doi:10.15252/embj.201386874), 2014-05-16
Supplement: embj0033-1365-sd7.pdf [file embj0033-1365-sd7.pdf]

**A**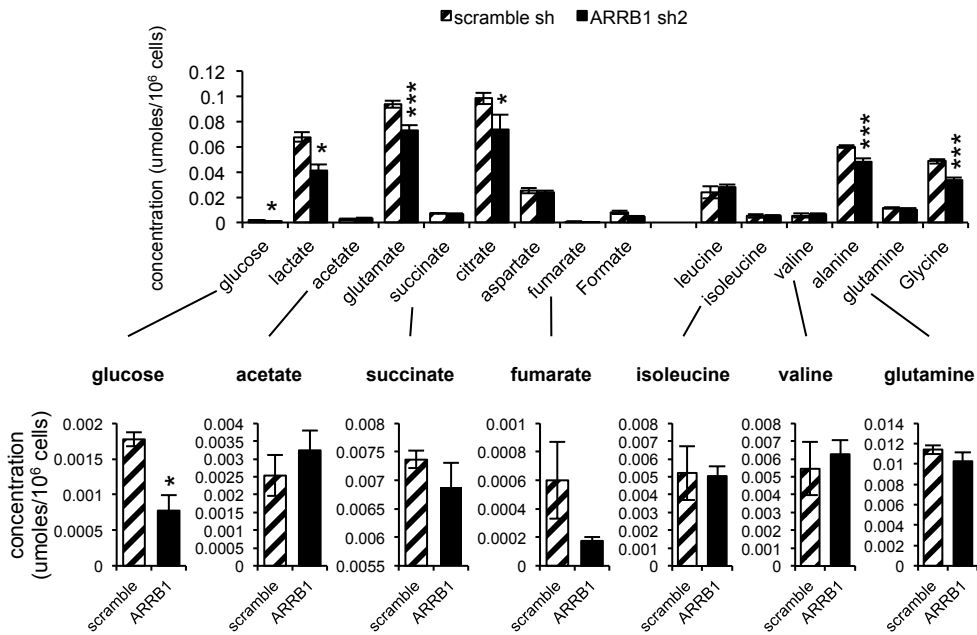**B**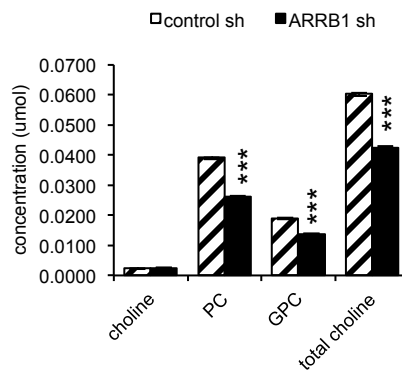**Supplemental Figure S7. ARRB1 regulates metabolism in prostate cancer cells.**

**A.** <sup>1</sup>H NMR Proton nuclear magnetic resonance measurements of intracellular glucose and lactate, amino acids and TCA intermediate in shARRB1 cells compared to scramble control.

**B.** Kennedy pathway phospholipid intermediate metabolites choline, phosphocholine (PC), glycerophosphocholine (GPC) and total choline in shARRB1 cells lysates compared to scramble control. N=3, values are mean ± s.e.m.
