# Supplementary material for: Nuclear ARRB1 induces pseudohypoxia and cellular metabolism reprogramming in prostate cancer
Source: PubMed Central journal article supplement (PMC4194125; doi:10.15252/embj.201386874), 2014-05-16
Supplement: embj0033-1365-sd10.pdf [file embj0033-1365-sd10.pdf]

Transparent process (uncropped, unaltered scanned blots)  
 Supplemental Figure S2

Figure S2F

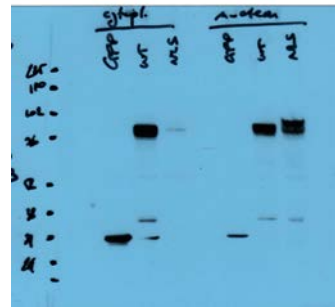

GFP

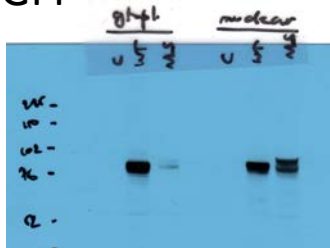

ARR1

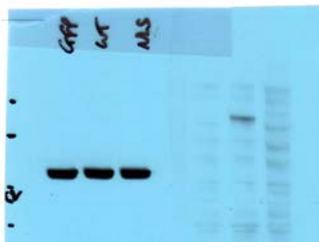

TUBB

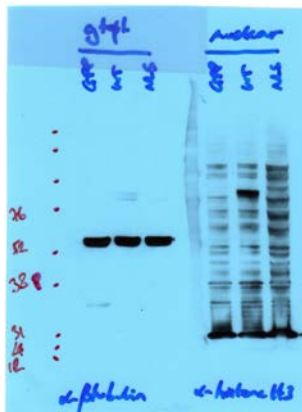

HISTH3

Figure S2G

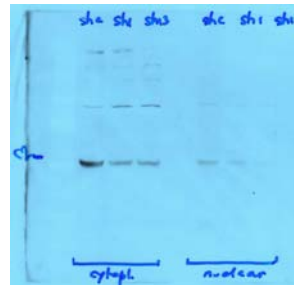

ARR1

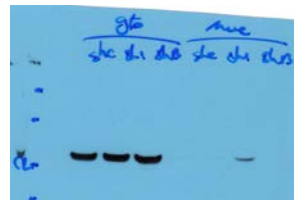

TUBB

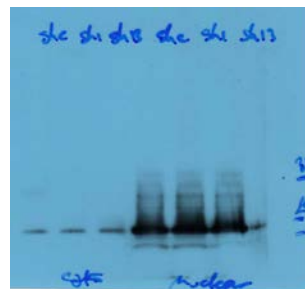

HISTH3
