# Supplementary material for: Nuclear ARRB1 induces pseudohypoxia and cellular metabolism reprogramming in prostate cancer
Source: PubMed Central journal article supplement (PMC4194125; doi:10.15252/embj.201386874), 2014-05-16

Transparent process (uncropped, unaltered scanned blots)

Figure S5

Figure S5D

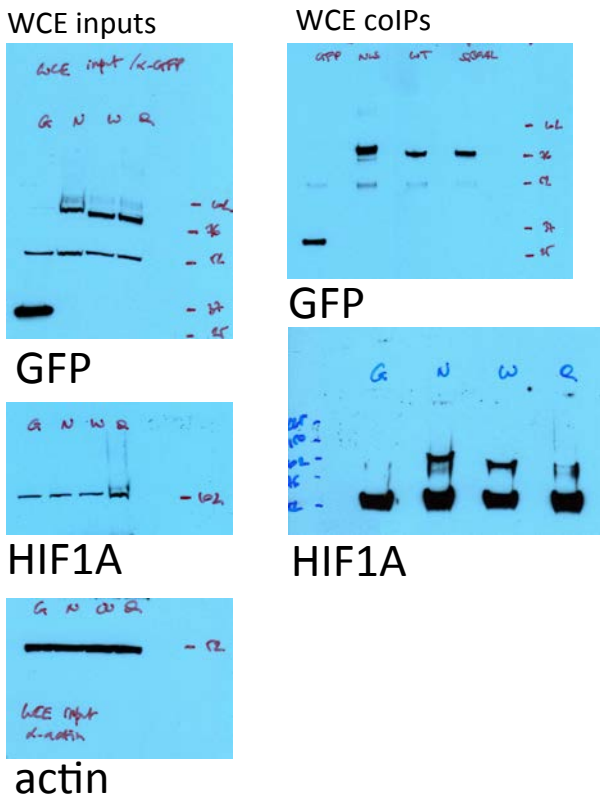

Figure S5E

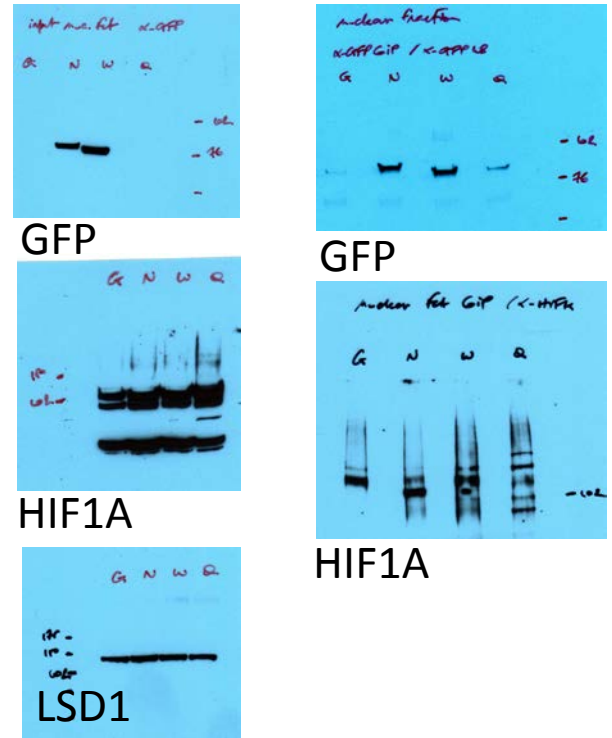

Figure S5F

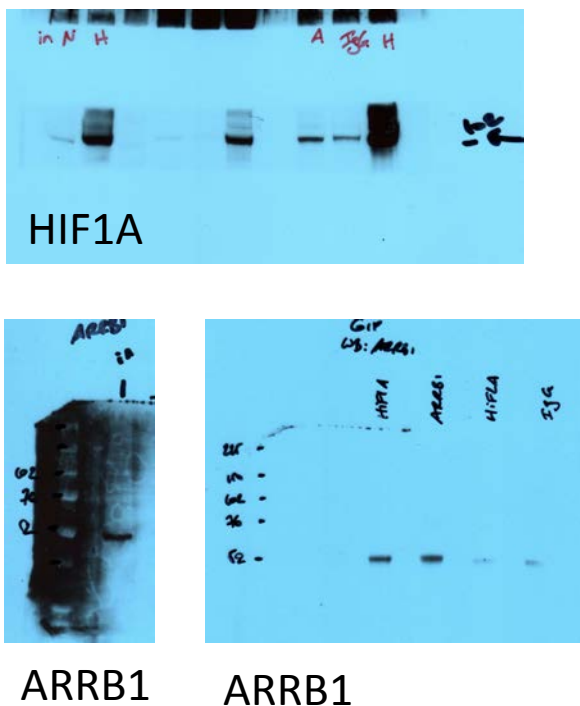

Figure S5G

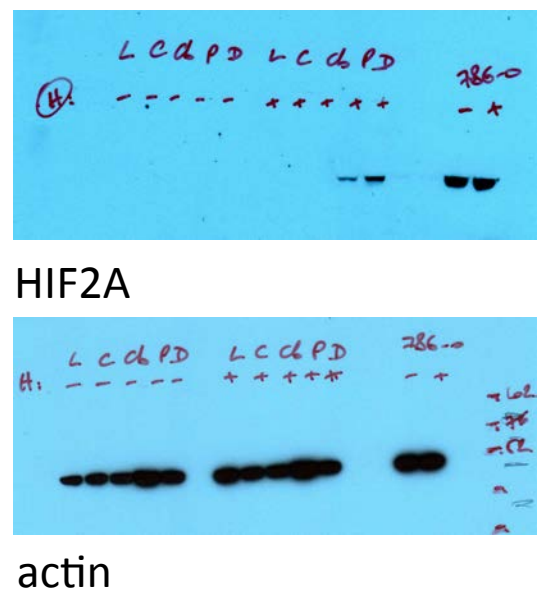

Supplement: embj0033-1365-sd11.pdf [file embj0033-1365-sd11.pdf]
