# Supplementary material for: Nuclear ARRB1 induces pseudohypoxia and cellular metabolism reprogramming in prostate cancer
Source: PubMed Central journal article supplement (PMC4194125; doi:10.15252/embj.201386874), 2014-05-16
Supplement: embj0033-1365-sd12.pdf [file embj0033-1365-sd12.pdf]

Transparent process (uncropped, unaltered scanned blots)  
 Supplemental Figure S6

Figure S6B

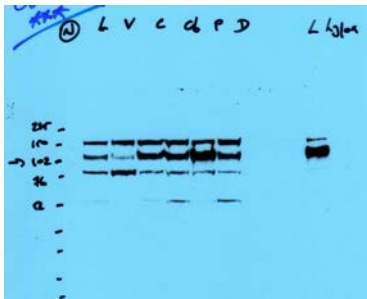

HIF1A Normoxia

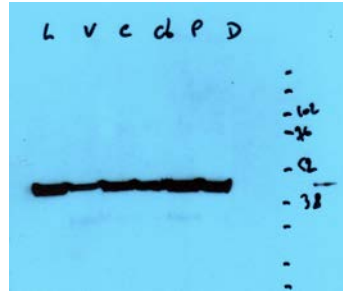

Actin Normoxia

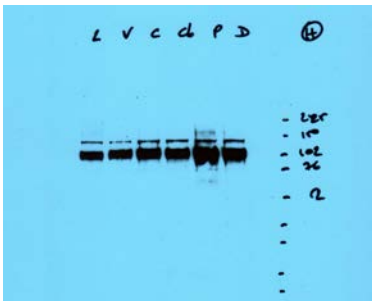

HIF1A Hypoxia

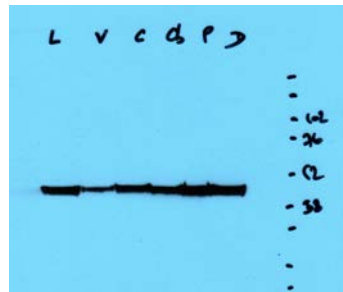

Actin Hypoxia

Figure S6C

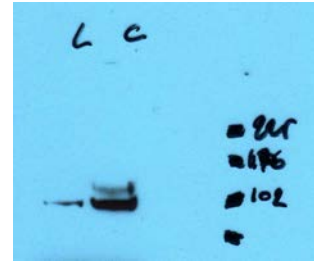

HIF1A

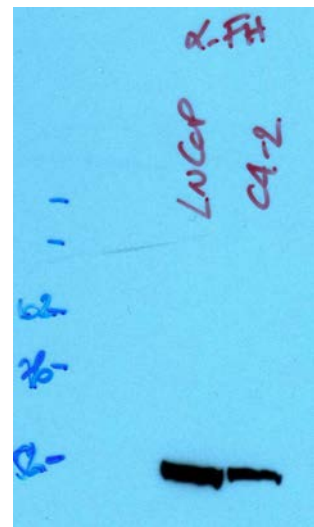

FH

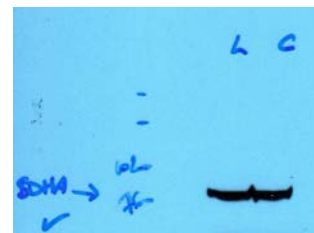

SDHA

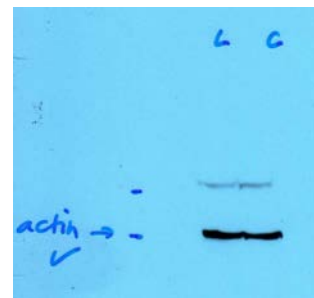

actin

Figure S6D

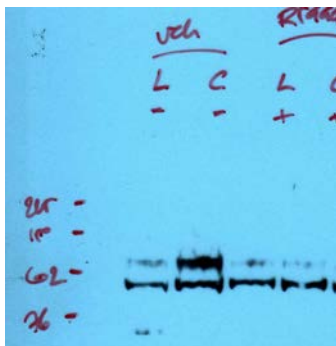

HIF1A

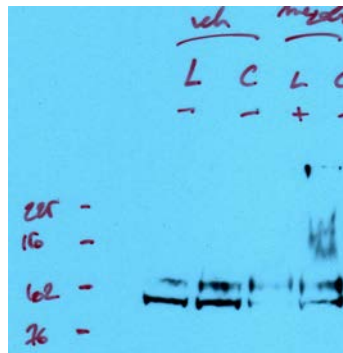

HIF1A

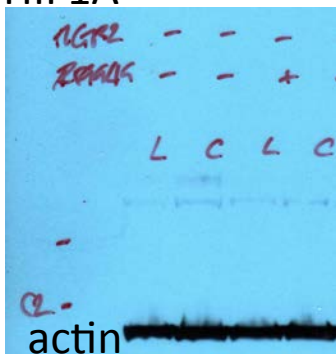

actin

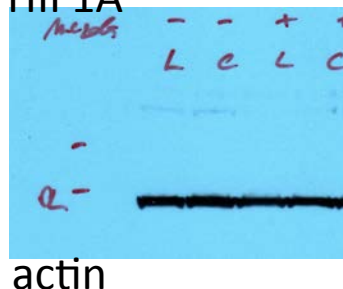

actin
