# Supplementary material for: Nuclear ARRB1 induces pseudohypoxia and cellular metabolism reprogramming in prostate cancer
Source: PubMed Central journal article supplement (PMC4194125; doi:10.15252/embj.201386874), 2014-05-16
Supplement: embj0033-1365-sd14.pdf [file embj0033-1365-sd14.pdf]

Transparent process (uncropped, unaltered scanned blots)  
 Figure 2

Figure 2A

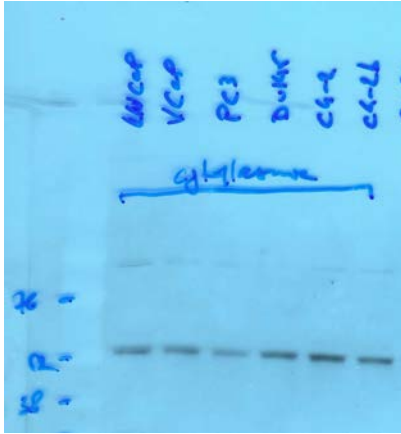

ARRB1

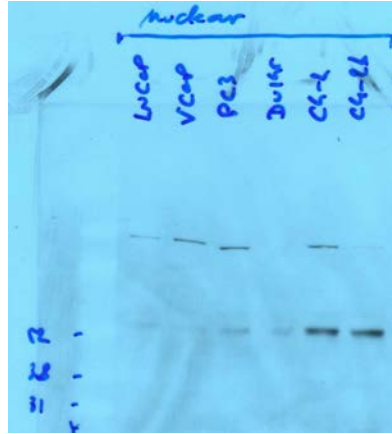

ARRB1

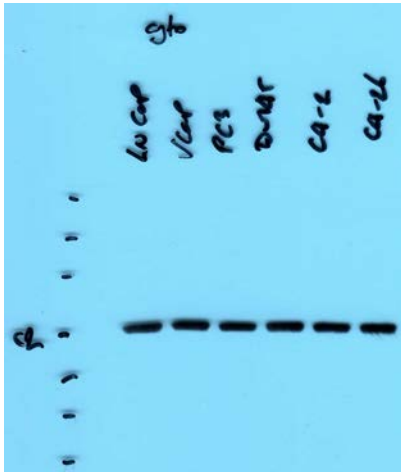

TUBB

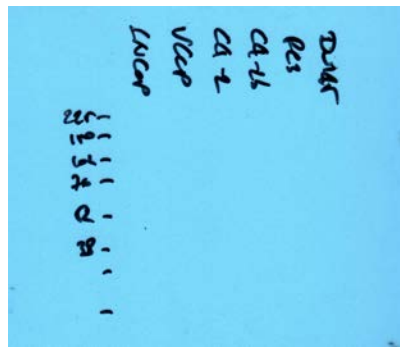

TUBB

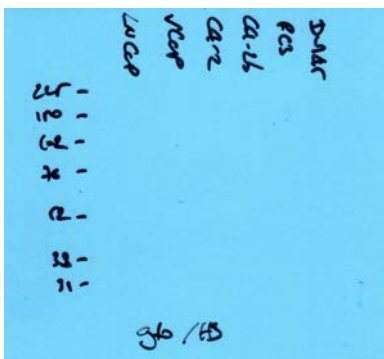

Histone H3

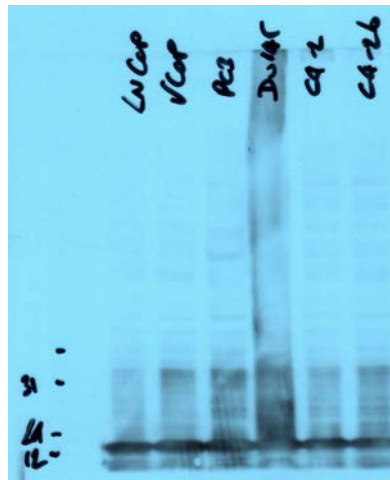

Histone H3
