# Supplementary material for: Nuclear ARRB1 induces pseudohypoxia and cellular metabolism reprogramming in prostate cancer
Source: PubMed Central journal article supplement (PMC4194125; doi:10.15252/embj.201386874), 2014-05-16
Supplement: embj0033-1365-sd15.pdf [file embj0033-1365-sd15.pdf]

Transparent process (uncropped, unaltered scanned blots)

Figure 6

Figure 6A

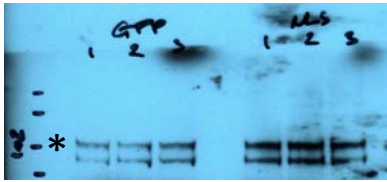

HIF1A

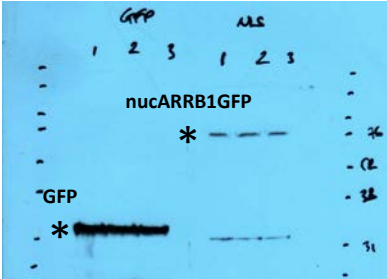

GFP

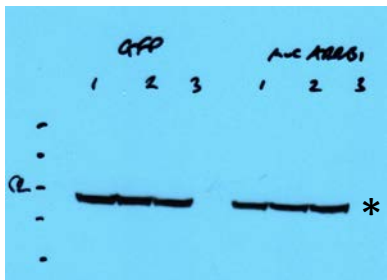

actin

Figure 6B

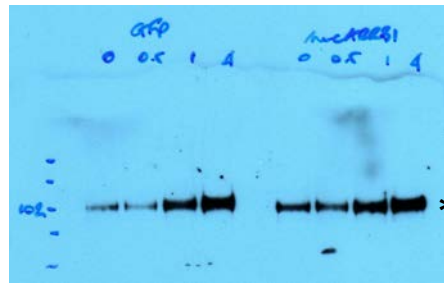

HIF1A

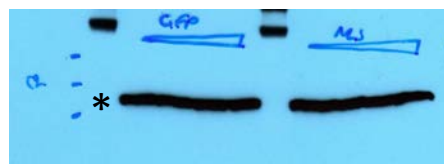

actin

Figure 6C

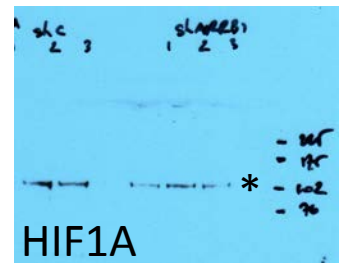

HIF1A

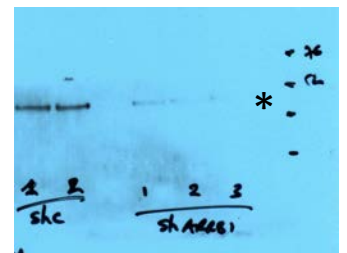

ARR1

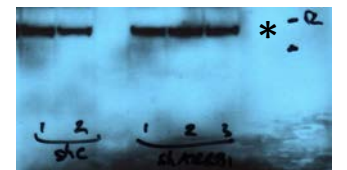

actin

Figure 6D

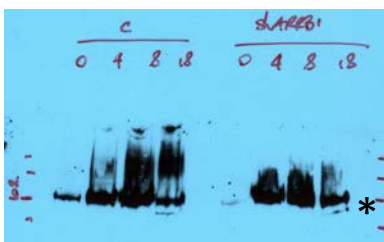

HIF1A

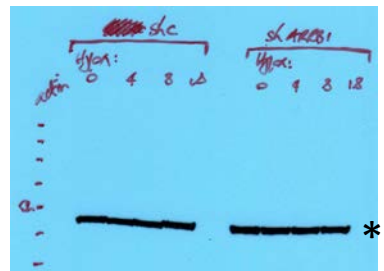

actin

Figure 6H

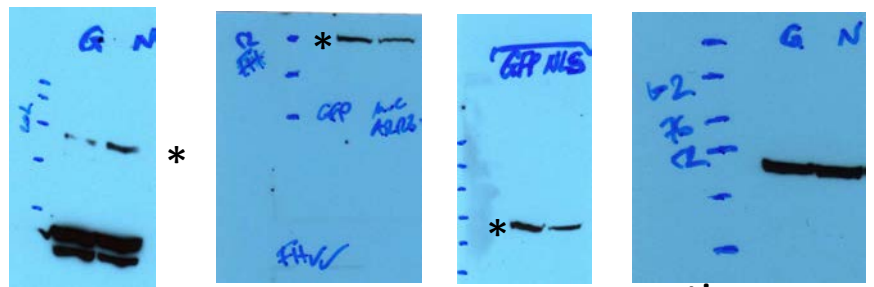

HIF1A

FH

SDHA

actin

Figure 6I

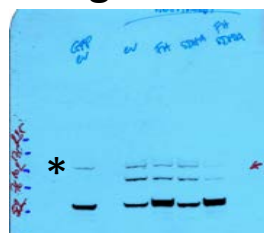

HIF1A

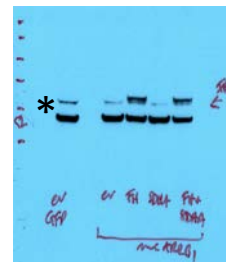

FH

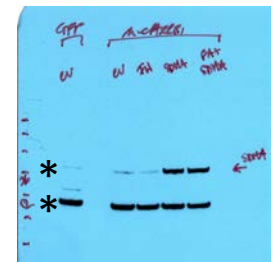

SDHA

actin
